# Supplementary material for: Manipulating topological Hall-like signatures by interface engineering in epitaxial ruthenate/manganite heterostructures
Source: Royal Society of Chemistry journal article supplement (doi:10.1039/d3nr02407e), 2023-01-01
Supplement: d3nr02407e1.pdf [file d3nr02407e1.pdf]

## Supporting information for

### Manipulating Topological Hall-like Signatures by Interface Engineering in Epitaxial Ruthenate/Manganite Heterostructures

Pinku Roy<sup>1,2,\*</sup>, Di Zhang<sup>2</sup>, Alessandro R. Mazza<sup>2</sup>, Nicholas Cucciniello<sup>1,2</sup>, Sundar Kunwar<sup>2</sup>, Hao Zeng<sup>3</sup>, Aiping Chen<sup>2,\*</sup>, and Quanxi Jia<sup>1,\*</sup>

<sup>1</sup>Department of Materials Design and Innovation, University at Buffalo - The State University of New York, Buffalo, NY 14260, USA

<sup>2</sup>Center for Integrated Nanotechnologies (CINT), Los Alamos National Laboratory, Los Alamos, New Mexico 87545, USA

<sup>3</sup>Department of Physics, University at Buffalo - The State University of New York, Buffalo, NY 14260, USA

\*Email: [pinkur@lanl.gov](mailto:pinkur@lanl.gov), [apchen@lanl.gov](mailto:apchen@lanl.gov), [qxjia@buffalo.edu](mailto:qxjia@buffalo.edu),

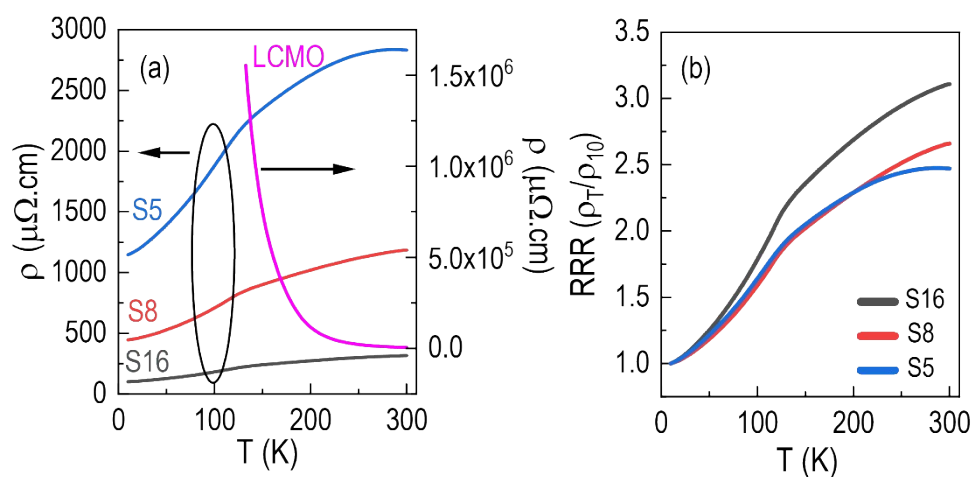

Figure S1: (a) temperature-dependent resistivity of *SRO/LCMO bilayers with SRO thickness 16 nm, 8 nm and 5 nm (left axis) and pure LCMO (right axis)* (b) corresponding residual resistivity ratio (RRR).

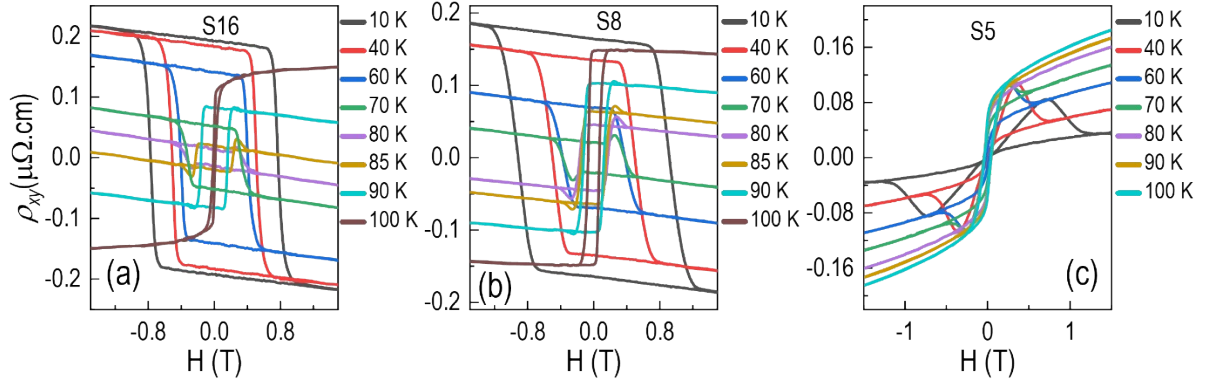

Figure S2: Hall resistivity of (a) S16, (b) S8 and (c) S5 from 10 K to 100 K

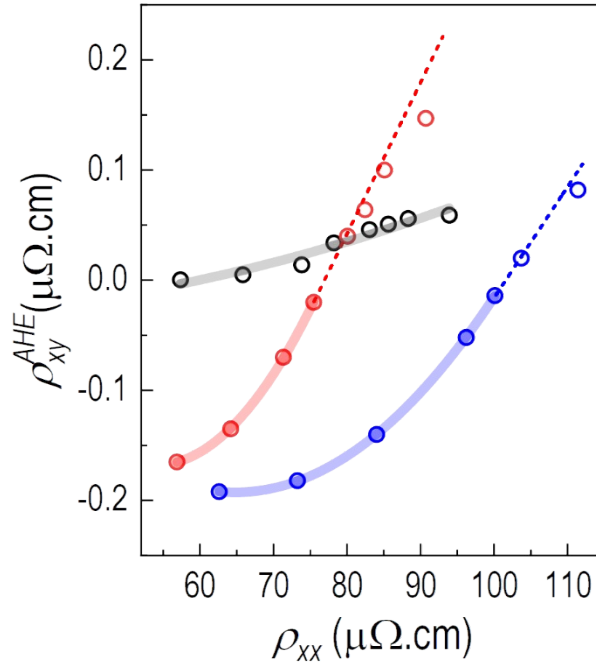

Figure S3: Scaling relation between Hall resistivity ( $\rho_{xy}$ ) and longitudinal resistivity ( $\rho_{xx}$ ) has been investigated using the relation  $\rho_{xy} = A \rho_{xx} + B \rho_{xx}^2 + C$ , where  $A$ ,  $B$  and  $C$  are constants and  $C$  represents the residual resistivity due to static impurities at low temperature<sup>1</sup>.

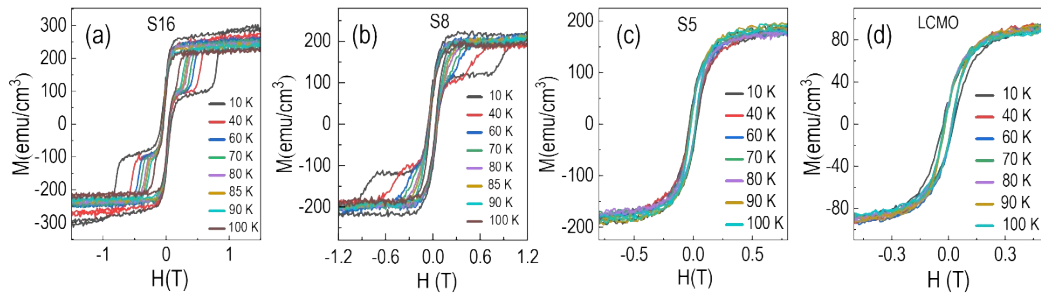

Figure S4: Magnetic hysteresis of (a) S16, (b) S8, (c) S5 and (d) pure LCMO film from 10 K to 100 K

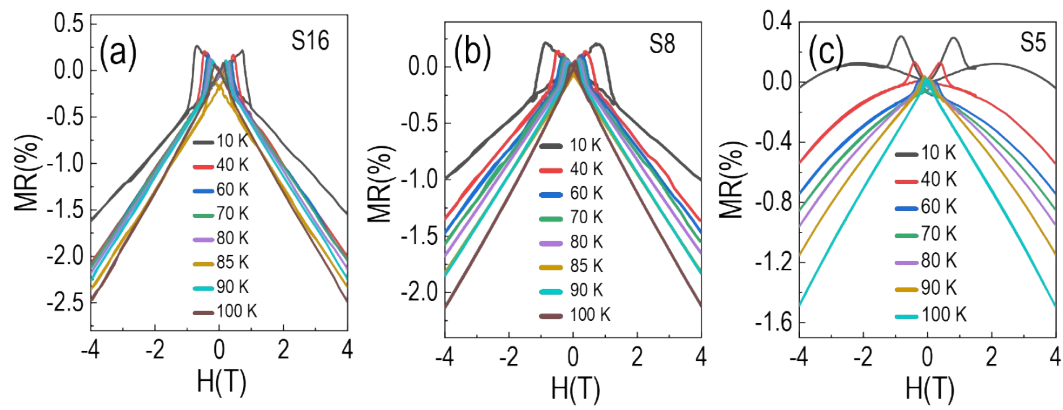

Figure S5: Magnetoresistance of (a) S16, (b) S8 and (c) S5 from 10 K to 100 K

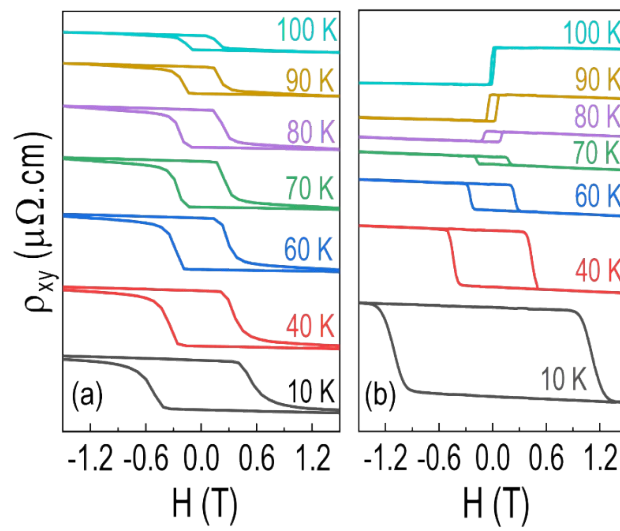

Figure S6: Hall resistivity of single layer SRO films with 16 nm and 5 nm thickness, respectively.

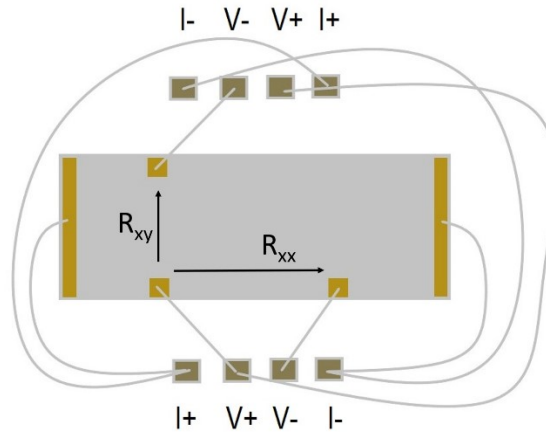

*Figure S7: The Hall bar geometry used for the transport measurement.*

### References:

- (1) Hou, D.; Su, G.; Tian, Y.; Jin, X.; Yang, S. A.; Niu, Q. Multivariable Scaling for the Anomalous Hall Effect. *Phys. Rev. Lett.* **2015**, *114* (21), 217203.  
<https://doi.org/10.1103/PhysRevLett.114.217203>.
